# Supplementary material for: Evaluation of Selected Parameters of the Specific Immune Response against Pseudomonas aeruginosa Strains
Source: MDPI journal article supplement (doi:10.3390/cells11010003), 2021-12-21
Supplement: s1 [file s1]

Table S4: Difference in percentage [%] of HLA-DR+ PBMCs in culture-stimulated lysates.

| Difference in percentage [%] of HLA-DR+ PBMCs in culture-stimulated lysates |      |      |      |      |      |      |      |      |      |       |       |       |       |       |       |
|-----------------------------------------------------------------------------|------|------|------|------|------|------|------|------|------|-------|-------|-------|-------|-------|-------|
| $\chi^2$ ANOVA = 19.06 p<0.16272                                            |      |      |      |      |      |      |      |      |      |       |       |       |       |       |       |
|                                                                             | Pa 1 | Pa 2 | Pa 3 | Pa 4 | Pa 5 | Pa 6 | Pa 7 | Pa 8 | Pa 9 | Pa 10 | Pa 11 | Pa 12 | Pa 13 | Pa 14 | Pa 15 |
| Pa 1                                                                        | -    | NS    | NS    | NS    | NS    | NS    | NS    |
| Pa 2                                                                        | NS   | -    | NS    | NS    | NS    | NS    | NS    | NS    |
| Pa 3                                                                        | NS   | NS   | -    | NS    | NS    | NS    | NS    | NS    | NS    |
| Pa 4                                                                        | NS   | NS   | NS   | -    | NS   | NS   | NS   | NS   | NS   | NS    | NS    | NS    | NS    | NS    | NS    |
| Pa 5                                                                        | NS   | NS   | NS   | NS   | -    | NS   | NS   | NS   | NS   | NS    | NS    | NS    | NS    | NS    | NS    |
| Pa 6                                                                        | NS   | NS   | NS   | NS   | NS   | -    | NS   | NS   | NS   | NS    | NS    | NS    | NS    | NS    | NS    |
| Pa 7                                                                        | NS   | NS   | NS   | NS   | NS   | NS   | -    | NS   | NS   | NS    | NS    | NS    | NS    | NS    | NS    |
| Pa 8                                                                        | NS   | -    | NS   | NS    | NS    | NS    | NS    | NS    | NS    |
| Pa 9                                                                        | NS   | -    | NS    | NS    | NS    | NS    | NS    | NS    |
| Pa 10                                                                       | NS   | -     | NS    | NS    | NS    | NS    | NS    |
| Pa 11                                                                       | NS    | -     | NS    | NS    | NS    | NS    |
| Pa 12                                                                       | NS    | NS    | -     | NS    | NS    | NS    |
| Pa 13                                                                       | NS    | NS    | NS    | -     | NS    | NS    |
| Pa 14                                                                       | NS    | NS    | NS    | NS    | -     | NS    |
| Pa 15                                                                       | NS    | NS    | NS    | NS    | NS    | -     |
| No.                                                                         | Pa 1 | Pa 2 | Pa 3 | Pa 4 | Pa 5 | Pa 6 | Pa 7 | Pa 8 | Pa 9 | Pa 10 | Pa 11 | Pa 12 | Pa 13 | Pa 14 | Pa 15 |
| median                                                                      | 3.52 | 5.47 | 4.76 | 4.21 | 4.34 | 4.35 | 4.33 | 4.66 | 4.54 | 4.31  | 3.86  | 3.83  | 4.11  | 3.46  | 3.97  |
| IQR                                                                         | 2.54 | 2.66 | 2.9  | 1.13 | 1.04 | 1.17 | 1.2  | 2.66 | 1.96 | 1.66  | 1.82  | 2.53  | 2.44  | 2.3   | 0.72  |
