# Supplementary material for: Evaluation of Selected Parameters of the Specific Immune Response against Pseudomonas aeruginosa Strains
Source: MDPI journal article supplement (doi:10.3390/cells11010003), 2021-12-21
Supplement: s1 [file s1]

Table S5: Difference in expression of HLA-DR on PBMCs – MFI.

| Difference in expression of HLA-DR on PBMCs - MFI [AU] |        |        |        |        |        |        |        |        |        |        |        |        |        |        |        |
|--------------------------------------------------------|--------|--------|--------|--------|--------|--------|--------|--------|--------|--------|--------|--------|--------|--------|--------|
| $\chi^2$ ANOVA = 48.41 p<0.00001                       |        |        |        |        |        |        |        |        |        |        |        |        |        |        |        |
|                                                        | Pa 1   | Pa 2   | Pa 3   | Pa 4   | Pa 5   | Pa 6   | Pa 7   | Pa 8   | Pa 9   | Pa 10  | Pa 11  | Pa 12  | Pa 13  | Pa 14  | Pa 15  |
| Pa 1                                                   | -      | NS     | NS     | NS     | NS     | NS     | p<0.05 | NS     | p<0.05 | NS     | NS     | NS     | p<0.05 | p<0.05 | p<0.05 |
| Pa 2                                                   | NS     | -      | NS     |
| Pa 3                                                   | NS     | NS     | -      | NS     | p<0.05 | NS     | NS     |
| Pa 4                                                   | NS     | NS     | NS     | -      | NS     |
| Pa 5                                                   | NS     | NS     | NS     | NS     | -      | NS     | p<0.05 | NS     | NS     |
| Pa 6                                                   | NS     | NS     | NS     | NS     | NS     | -      | NS     |
| Pa 7                                                   | p<0.05 | NS     | NS     | NS     | NS     | NS     | -      | NS     |
| Pa 8                                                   | NS     | -      | NS     |
| Pa 9                                                   | p<0.05 | NS     | -      | NS     | NS     | NS     | NS     | NS     | NS     |
| Pa 10                                                  | NS     | -      | NS     | NS     | NS     | NS     | NS     |
| Pa 11                                                  | NS     | -      | NS     | NS     | NS     | NS     |
| Pa 12                                                  | NS     | -      | NS     | NS     | NS     |
| Pa 13                                                  | p<0.05 | NS     | p<0.05 | NS     | p<0.05 | NS     | -      | NS     | NS     |
| Pa 14                                                  | p<0.05 | NS     | -      | NS     |
| Pa 15                                                  | p<0.05 | NS     | -      |
| No.                                                    | Pa 1   | Pa 2   | Pa 3   | Pa 4   | Pa 5   | Pa 6   | Pa 7   | Pa 8   | Pa 9   | Pa 10  | Pa 11  | Pa 12  | Pa 13  | Pa 14  | Pa 15  |
| median                                                 | 391.87 | 326.13 | 329.77 | 314.01 | 328.65 | 324.31 | 308,72 | 315,35 | 285.07 | 330.45 | 305.77 | 327.77 | 265.53 | 303.69 | 285.14 |
| IQR                                                    | 47.05  | 27.5   | 115.44 | 49.23  | 20.43  | 52.11  | 73.09  | 67.88  | 89.37  | 77.91  | 40.71  | 87.07  | 39.57  | 84.5   | 27.93  |
