# Supplementary material for: Evaluation of Selected Parameters of the Specific Immune Response against Pseudomonas aeruginosa Strains
Source: MDPI journal article supplement (doi:10.3390/cells11010003), 2021-12-21
Supplement: s1 [file s1]

Table S1: The sequences of primers used in assessment of virulence genes expression.

| <i>Gene</i> | primers | Nucleotide sequence        | Amplicon size [bp] |
|-------------|---------|----------------------------|--------------------|
| <i>algD</i> | forward | ATGCGAATCAGCATCTTTGGT      | 1310               |
|             | reverse | CTACCAGCAGATGCCCTCGGC      |                    |
| <i>lasB</i> | forward | GGAATGAACGAAGCGTTCTC       | 300                |
|             | reverse | GGTCCAGTAGTAGCGGTTGG       |                    |
| <i>toxA</i> | forward | GGTAACCAGCTCAGCCACAT       | 352                |
|             | reverse | TGATGTCCAGGTCATGCTTC       |                    |
| <i>plcH</i> | forward | GGAAGCCATGGGCTACTTCAA      | 307                |
|             | reverse | AGAGTGACGAGGAGCGGTAG       |                    |
| <i>plcN</i> | forward | GTTATCGCAACCAGCCCTAC       | 466                |
|             | reverse | AGGTCGAACACCTGGAACAC       |                    |
| <i>exoS</i> | forward | CTTGAAGGGACTCGACAAGG       | 504                |
|             | reverse | TTCAGGTCCGCGTAGTGAAT       |                    |
| <i>nan1</i> | forward | AGGATGAATACTTATTTTGAT      | 1316               |
|             | reverse | TCACTAAATCCATCTCTGACCCGATA |                    |
