# Supplementary material for: Evaluation of Selected Parameters of the Specific Immune Response against Pseudomonas aeruginosa Strains
Source: MDPI journal article supplement (doi:10.3390/cells11010003), 2021-12-21
Supplement: s1 [file s1]

Table S7: Differences in percentages of CD3+CD4+IL-17+ cells.

| Differences in percentages of CD3+CD4+IL-17+ cells [%] |      |      |      |      |      |      |      |      |      |       |       |       |       |       |       |
|--------------------------------------------------------|------|------|------|------|------|------|------|------|------|-------|-------|-------|-------|-------|-------|
| $\chi^2$ ANOVA = 19.38 p<0.15076                       |      |      |      |      |      |      |      |      |      |       |       |       |       |       |       |
|                                                        | Pa 1 | Pa 2 | Pa 3 | Pa 4 | Pa 5 | Pa 6 | Pa 7 | Pa 8 | Pa 9 | Pa 10 | Pa 11 | Pa 12 | Pa 13 | Pa 14 | Pa 15 |
| Pa 1                                                   | -    | NS    | NS    | NS    | NS    | NS    | NS    |
| Pa 2                                                   | NS   | -    | NS    | NS    | NS    | NS    | NS    | NS    |
| Pa 3                                                   | NS   | NS   | -    | NS    | NS    | NS    | NS    | NS    | NS    |
| Pa 4                                                   | NS   | NS   | NS   | -    | NS   | NS   | NS   | NS   | NS   | NS    | NS    | NS    | NS    | NS    | NS    |
| Pa 5                                                   | NS   | NS   | NS   | NS   | -    | NS   | NS   | NS   | NS   | NS    | NS    | NS    | NS    | NS    | NS    |
| Pa 6                                                   | NS   | NS   | NS   | NS   | NS   | -    | NS   | NS   | NS   | NS    | NS    | NS    | NS    | NS    | NS    |
| Pa 7                                                   | NS   | NS   | NS   | NS   | NS   | NS   | -    | NS   | NS   | NS    | NS    | NS    | NS    | NS    | NS    |
| Pa 8                                                   | NS   | -    | NS   | NS    | NS    | NS    | NS    | NS    | NS    |
| Pa 9                                                   | NS   | -    | NS    | NS    | NS    | NS    | NS    | NS    |
| Pa 10                                                  | NS   | -     | NS    | NS    | NS    | NS    | NS    |
| Pa 11                                                  | NS    | -     | NS    | NS    | NS    | NS    |
| Pa 12                                                  | NS    | NS    | -     | NS    | NS    | NS    |
| Pa 13                                                  | NS    | NS    | NS    | -     | NS    | NS    |
| Pa 14                                                  | NS    | NS    | NS    | NS    | -     | NS    |
| Pa 15                                                  | NS    | NS    | NS    | NS    | NS    | -     |
| No.                                                    | Pa 1 | Pa 2 | Pa 3 | Pa 4 | Pa 5 | Pa 6 | Pa 7 | Pa 8 | Pa 9 | Pa 10 | Pa 11 | Pa 12 | Pa 13 | Pa 14 | Pa 15 |
| median                                                 | 1.16 | 0.37 | 0.46 | 0.38 | 0.4  | 0.39 | 0.35 | 0.29 | 0.59 | 0.58  | 0.95  | 0.8   | 0.44  | 0.48  | 0.58  |
| IQR                                                    | 0.98 | 1.16 | 0.37 | 0.24 | 0.26 | 0.18 | 0.69 | 0.32 | 1.26 | 0.72  | 2.63  | 4.42  | 5.14  | 3.97  | 4.72  |
