# Supplementary material for: Evaluation of Selected Parameters of the Specific Immune Response against Pseudomonas aeruginosa Strains
Source: MDPI journal article supplement (doi:10.3390/cells11010003), 2021-12-21
Supplement: s1 [file s1]

Table S6: Differences in percentages of CD3+CD4+ cells.

| Differences in percentages of CD3+CD4+ cells [%] |        |       |       |       |       |       |       |        |       |       |       |       |       |       |        |
|--------------------------------------------------|--------|-------|-------|-------|-------|-------|-------|--------|-------|-------|-------|-------|-------|-------|--------|
| $\chi^2$ ANOVA = 40.266 p<0.00023                |        |       |       |       |       |       |       |        |       |       |       |       |       |       |        |
|                                                  | Pa 1   | Pa 2  | Pa 3  | Pa 4  | Pa 5  | Pa 6  | Pa 7  | Pa 8   | Pa 9  | Pa 10 | Pa 11 | Pa 12 | Pa 13 | Pa 14 | Pa 15  |
| Pa 1                                             | -      | NS    | NS    | NS    | NS    | NS    | NS    | p<0.05 | NS    | NS    | NS    | NS    | NS    | NS    | p<0.05 |
| Pa 2                                             | NS     | -     | NS    | NS    | NS    | NS    | NS    | NS     | NS    | NS    | NS    | NS    | NS    | NS    | NS     |
| Pa 3                                             | NS     | NS    | -     | NS    | NS    | NS    | NS    | NS     | NS    | NS    | NS    | NS    | NS    | NS    | NS     |
| Pa 4                                             | NS     | NS    | NS    | -     | NS    | NS    | NS    | NS     | NS    | NS    | NS    | NS    | NS    | NS    | NS     |
| Pa 5                                             | NS     | NS    | NS    | NS    | -     | NS    | NS    | NS     | NS    | NS    | NS    | NS    | NS    | NS    | NS     |
| Pa 6                                             | NS     | NS    | NS    | NS    | NS    | -     | NS    | NS     | NS    | NS    | NS    | NS    | NS    | NS    | NS     |
| Pa 7                                             | NS     | NS    | NS    | NS    | NS    | NS    | -     | NS     | NS    | NS    | NS    | NS    | NS    | NS    | NS     |
| Pa 8                                             | p<0.05 | NS    | NS    | NS    | NS    | NS    | NS    | -      | NS     |
| Pa 9                                             | NS     | NS    | NS    | NS    | NS    | NS    | NS    | NS     | -     | NS    | NS    | NS    | NS    | NS    | NS     |
| Pa 10                                            | NS     | NS    | NS    | NS    | NS    | NS    | NS    | NS     | NS    | -     | NS    | NS    | NS    | NS    | NS     |
| Pa 11                                            | NS     | NS    | NS    | NS    | NS    | NS    | NS    | NS     | NS    | NS    | -     | NS    | NS    | NS    | NS     |
| Pa 12                                            | NS     | NS    | NS    | NS    | NS    | NS    | NS    | NS     | NS    | NS    | NS    | -     | NS    | NS    | NS     |
| Pa 13                                            | NS     | NS    | NS    | NS    | NS    | NS    | NS    | NS     | NS    | NS    | NS    | NS    | -     | NS    | NS     |
| Pa 14                                            | NS     | NS    | NS    | NS    | NS    | NS    | NS    | NS     | NS    | NS    | NS    | NS    | NS    | -     | NS     |
| Pa 15                                            | p<0.05 | NS     | NS    | NS    | NS    | NS    | NS    | NS    | -      |
| No.                                              | Pa 1   | Pa 2  | Pa 3  | Pa 4  | Pa 5  | Pa 6  | Pa 7  | Pa 8   | Pa 9  | Pa 10 | Pa 11 | Pa 12 | Pa 13 | Pa 14 | Pa 15  |
| median                                           | 41.41  | 42.67 | 34.37 | 41.55 | 41.42 | 42.78 | 42.78 | 40.51  | 41.92 | 39.72 | 42.27 | 42.36 | 41.07 | 40.03 | 40.53  |
| IQR                                              | 13.81  | 12.45 | 14.47 | 13.84 | 14.7  | 12.24 | 13.03 | 13.11  | 18.11 | 16.91 | 14.11 | 11.56 | 14.45 | 13.79 | 18.2   |
