# Supplementary material for: Evaluation of Selected Parameters of the Specific Immune Response against Pseudomonas aeruginosa Strains
Source: MDPI journal article supplement (doi:10.3390/cells11010003), 2021-12-21
Supplement: s1 [file s1]

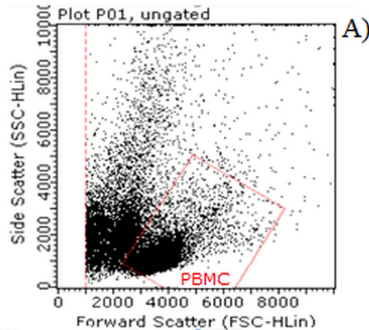

A)

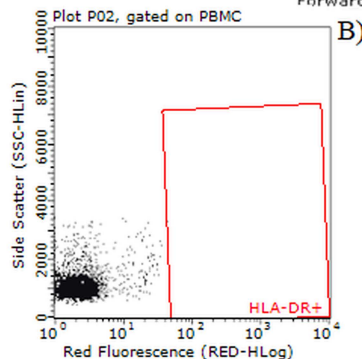

B)

unstained control

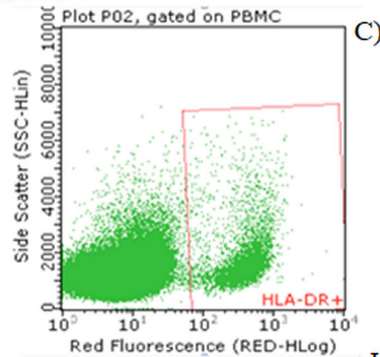

C)

experimental sample

HLA-DR

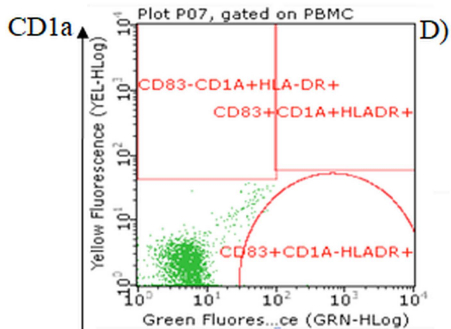

D)

control sample w/o  
CD83 and CD1a staining

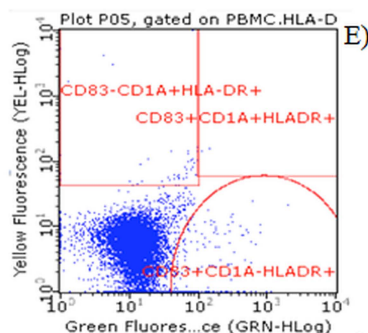

E)

experimental sample

CD83
