# Supplementary material for: Evaluation of Selected Parameters of the Specific Immune Response against Pseudomonas aeruginosa Strains
Source: MDPI journal article supplement (doi:10.3390/cells11010003), 2021-12-21
Supplement: s1 [file s1]

Table S1: Difference in percentage [%] of mature (CD83+CD1a-HLA-DR++) dendritic cells after stimulation with bacterial lysates between individual patients.

| Difference in percentage [%] of mature dendritic cells in lysate-stimulated cultures. |       |       |       |       |       |       |       |       |       |       |       |       |       |       |       |
|---------------------------------------------------------------------------------------|-------|-------|-------|-------|-------|-------|-------|-------|-------|-------|-------|-------|-------|-------|-------|
| $\chi^2$ ANOVA = 33.75 p<0.00224                                                      |       |       |       |       |       |       |       |       |       |       |       |       |       |       |       |
|                                                                                       | Pa 1  | Pa 2  | Pa 3  | Pa 4  | Pa 5  | Pa 6  | Pa 7  | Pa 8  | Pa 9  | Pa 10 | Pa 11 | Pa 12 | Pa 13 | Pa 14 | Pa 15 |
| Pa 1                                                                                  | -     | NS    |
| Pa 2                                                                                  | NS    | -     | NS    |
| Pa 3                                                                                  | NS    | NS    | -     | NS    |
| Pa 4                                                                                  | NS    | NS    | NS    | -     | NS    |
| Pa 5                                                                                  | NS    | NS    | NS    | NS    | -     | NS    |
| Pa 6                                                                                  | NS    | NS    | NS    | NS    | NS    | -     | NS    |
| Pa 7                                                                                  | NS    | NS    | NS    | NS    | NS    | NS    | -     | NS    |
| Pa 8                                                                                  | NS    | -     | NS    |
| Pa 9                                                                                  | NS    | -     | NS    | NS    | NS    | NS    | NS    | NS    |
| Pa 10                                                                                 | NS    | -     | NS    | NS    | NS    | NS    | NS    |
| Pa 11                                                                                 | NS    | -     | NS    | NS    | NS    | NS    |
| Pa 12                                                                                 | NS    | -     | NS    | NS    | NS    |
| Pa 13                                                                                 | NS    | -     | NS    | NS    |
| Pa 14                                                                                 | NS    | -     | NS    |
| Pa 15                                                                                 | NS    | -     |
| No.                                                                                   | Pa 1  | Pa 2  | Pa 3  | Pa 4  | Pa 5  | Pa 6  | Pa 7  | Pa 8  | Pa 9  | Pa 10 | Pa 11 | Pa 12 | Pa 13 | Pa 14 | Pa 15 |
| median                                                                                | 16.5  | 15.78 | 12.97 | 13.56 | 10.84 | 12.79 | 11.33 | 10.06 | 10.31 | 10.26 | 9.27  | 9.23  | 10.48 | 10.0  | 8.83  |
| IQR                                                                                   | 12,56 | 3,34  | 8.76  | 2.86  | 5.71  | 6.19  | 6.3   | 3.9   | 3.96  | 5.71  | 4.09  | 11.23 | 6.5   | 7.06  | 6.16  |
