# Supplementary material for: Evaluation of Selected Parameters of the Specific Immune Response against Pseudomonas aeruginosa Strains
Source: MDPI journal article supplement (doi:10.3390/cells11010003), 2021-12-21
Supplement: s1 [file s1]

Table S2: Difference in percentage [%] of partially matured (CD83+CD1a+HLA–DR+) dendritic cells after stimulation with bacterial lysates between individual patients.

| Difference in percentage [%] of partially matured dendritic cells in lysate-stimulated cultures. |      |      |      |      |      |      |      |      |      |       |       |       |       |       |       |
|--------------------------------------------------------------------------------------------------|------|------|------|------|------|------|------|------|------|-------|-------|-------|-------|-------|-------|
| $\chi^2$ ANOVA = 18.53 p<0.18379                                                                 |      |      |      |      |      |      |      |      |      |       |       |       |       |       |       |
|                                                                                                  | Pa 1 | Pa 2 | Pa 3 | Pa 4 | Pa 5 | Pa 6 | Pa 7 | Pa 8 | Pa 9 | Pa 10 | Pa 11 | Pa 12 | Pa 13 | Pa 14 | Pa 15 |
| Pa 1                                                                                             | -    | NS    | NS    | NS    | NS    | NS    | NS    |
| Pa 2                                                                                             | NS   | -    | NS    | NS    | NS    | NS    | NS    | NS    |
| Pa 3                                                                                             | NS   | NS   | -    | NS    | NS    | NS    | NS    | NS    | NS    |
| Pa 4                                                                                             | NS   | NS   | NS   | -    | NS   | NS   | NS   | NS   | NS   | NS    | NS    | NS    | NS    | NS    | NS    |
| Pa 5                                                                                             | NS   | NS   | NS   | NS   | -    | NS   | NS   | NS   | NS   | NS    | NS    | NS    | NS    | NS    | NS    |
| Pa 6                                                                                             | NS   | NS   | NS   | NS   | NS   | -    | NS   | NS   | NS   | NS    | NS    | NS    | NS    | NS    | NS    |
| Pa 7                                                                                             | NS   | NS   | NS   | NS   | NS   | NS   | -    | NS   | NS   | NS    | NS    | NS    | NS    | NS    | NS    |
| Pa 8                                                                                             | NS   | -    | NS   | NS    | NS    | NS    | NS    | NS    | NS    |
| Pa 9                                                                                             | NS   | -    | NS    | NS    | NS    | NS    | NS    | NS    |
| Pa 10                                                                                            | NS   | -     | NS    | NS    | NS    | NS    | NS    |
| Pa 11                                                                                            | NS    | -     | NS    | NS    | NS    | NS    |
| Pa 12                                                                                            | NS    | NS    | -     | NS    | NS    | NS    |
| Pa 13                                                                                            | NS    | NS    | NS    | -     | NS    | NS    |
| Pa 14                                                                                            | NS    | NS    | NS    | NS    | -     | NS    |
| Pa 15                                                                                            | NS    | NS    | NS    | NS    | NS    | -     |
| No.                                                                                              | Pa 1 | Pa 2 | Pa 3 | Pa 4 | Pa 5 | Pa 6 | Pa 7 | Pa 8 | Pa 9 | Pa 10 | Pa 11 | Pa 12 | Pa 13 | Pa 14 | Pa 15 |
| median                                                                                           | 0.00 | 0.21 | 0.00 | 0.00 | 0.1  | 0.09 | 0.00 | 0.07 | 0.00 | 0.00  | 0.00  | 0.00  | 0.00  | 0.1   | 0.00  |
| IQR                                                                                              | 0.06 | 0.46 | 0.00 | 0.13 | 0.17 | 0.15 | 0.13 | 0.28 | 0.1  | 0.06  | 0.23  | 0.14  | 0.00  | 0.2   | 0.00  |
