# Supplementary figures and images for: Evaluation of Selected Parameters of the Specific Immune Response against Pseudomonas aeruginosa Strains
Source: MDPI journal article supplement (doi:10.3390/cells11010003), 2021-12-21

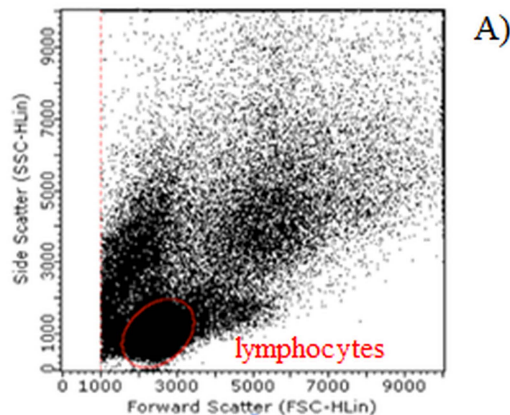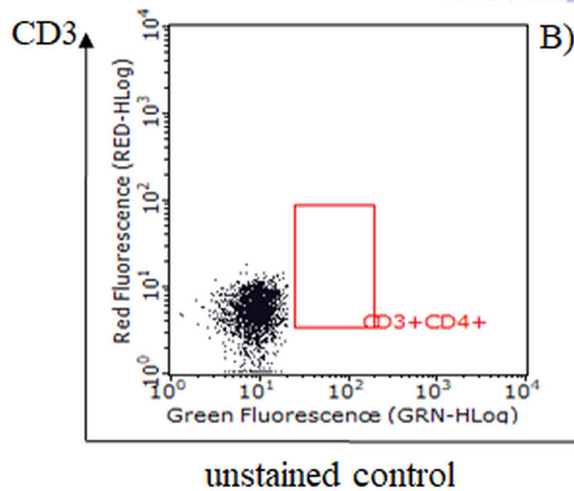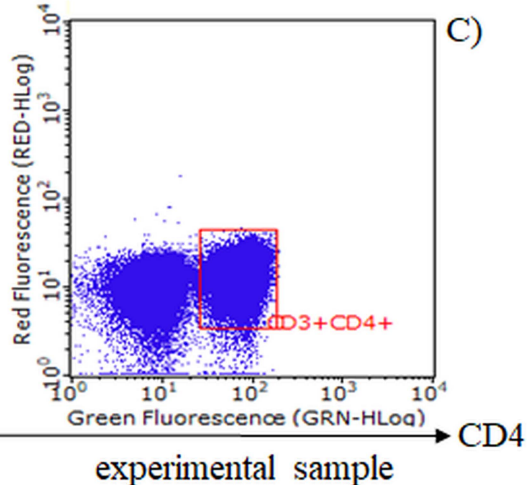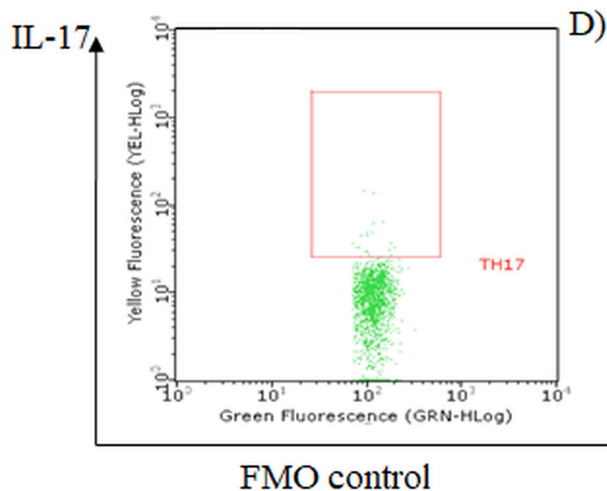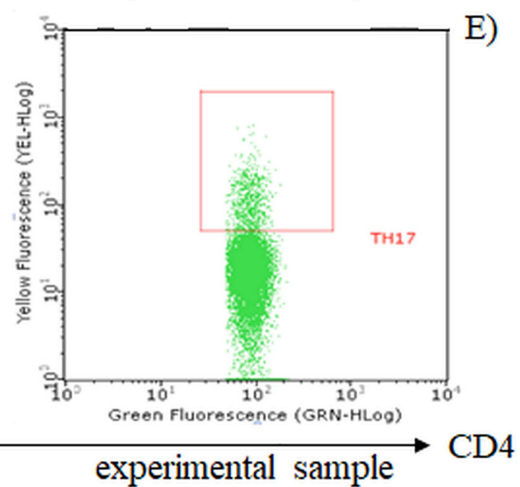

Supplement: s1 [file s1]
